# Supplementary material for: D Quantification of Tumor Vasculature in Lymphoma Xenografts in NOD/SCID Mice Allows to Detect Differences among Vascular-Targeted Therapies
Source: PubMed Central journal article supplement (PMC3608557; doi:10.1371/journal.pone.0059691), 2013-03-26
Supplement: pone.0059691.s002.pdf [file pone.0059691.s002.pdf]

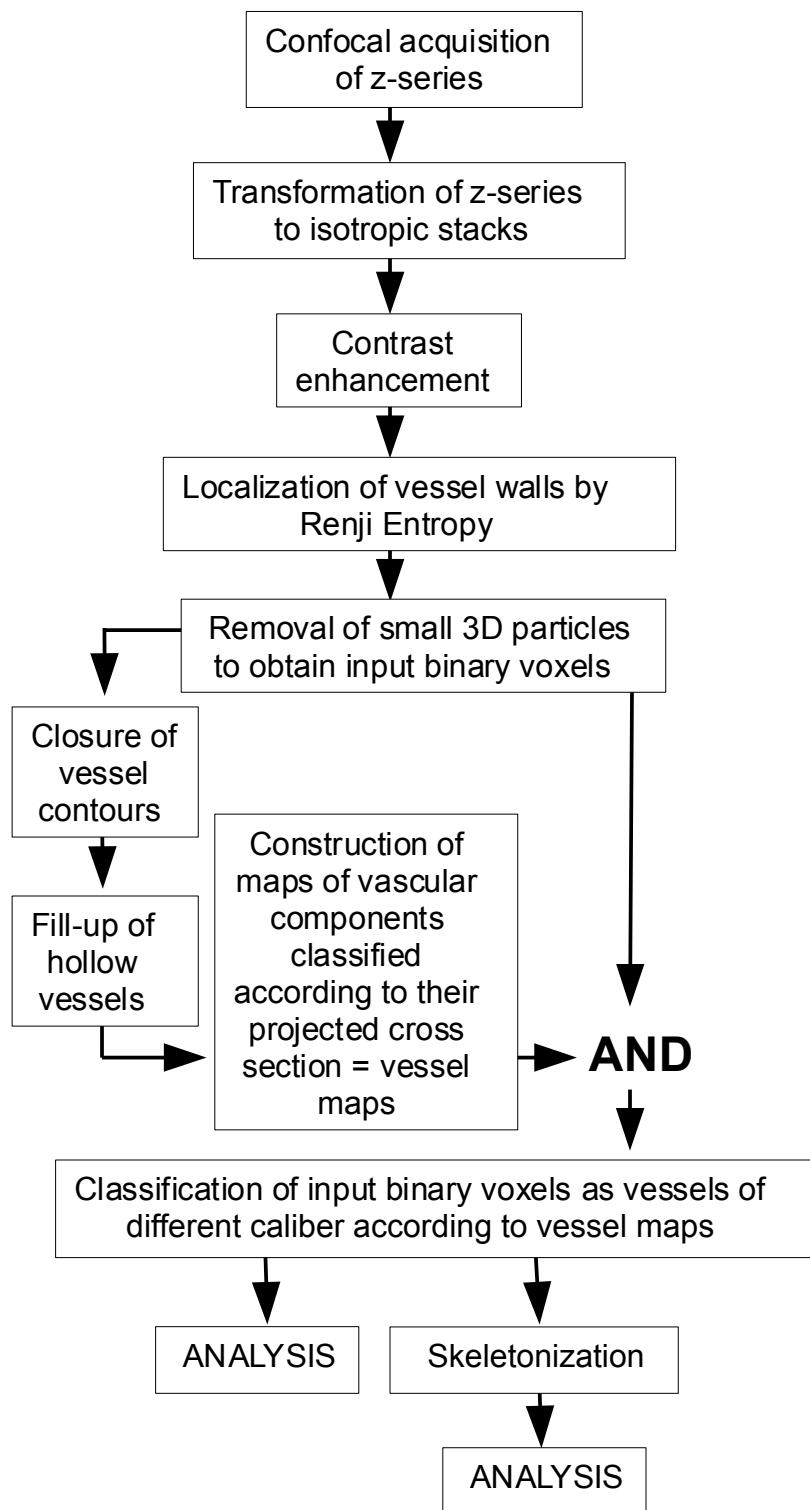

**Figure S2.** Workflow scheme for preparation of vessel maps and voxel classification according to intersection of vascular cross-sections with Cartesian planes. After classification, input voxels from vessels of different calibers were analyzed directly or following skeletonization.
